# Supplementary material for: Lunge feeding in early marine reptiles and fast evolution of marine tetrapod feeding guilds
Source: PubMed Central journal article supplement (PMC4354009; doi:10.1038/srep08900), 2015-03-10
Supplement: srep08900-s1.pdf [file srep08900-s1.pdf]

**Supplementary Information for:**

Lunge feeding in early marine reptiles and fast evolution of marine tetrapod feeding guilds

RYOSUKE MOTANI<sup>\*,1</sup>, XIAO-HONG CHEN<sup>\*,2</sup>, DA-YONG JIANG<sup>3</sup>, LONG CHENG<sup>2</sup>,

ANDREA TINTORI<sup>4</sup>, and OLIVIER RIEPPEL<sup>5</sup>

<sup>1</sup>Department of Earth and Planetary Sciences, University of California, Davis, One Shields Avenue, Davis, California 95616, U.S.A.;

<sup>2</sup>Wuhan Centre of China Geological Survey, Wuhan, Hubei 430023, P. R. China.

<sup>3</sup>Laboratory of Orogenic Belt and Crustal Evolution, Ministry of Education; Department of Geology and Geological Museum, Peking University, Yiheyuan Street. 5, Beijing 100871, P.R. China;

<sup>4</sup>Dipartimento di Scienze della Terra, Università degli Studi di Milano, Via Mangiagalli 34-20133 Milano, Italy

<sup>5</sup>Center of Integrative Research, The Field Museum, Chicago, IL 60605-2496, U. S. A;

\*Corresponding authors: RYOSUKE MOTANI, rmotani@ucdavis.edu; XIAO-HONG CHEN, yccxiaohong@163.com.

## Supplementary Note

### A. Permian marine reptile

Mesosaurus are the only group of marine reptiles before the Triassic but their limited geographical and temporal spans prevented them to affect the open marine trophic structure before the end-Permian extinction. These reptiles lived in restricted seas<sup>1</sup>, only for a short time span within the Artinskian (Early Permian)<sup>2</sup>.

1. Rossmann T. Studies on mesosaurs (Amniota inc. sed., Mesosauridae): 3. New aspects on the anatomy, preservation and palaeoecology, based on the specimens from the Palaeontological Institute of the University of Zurich. *Neues Jahrb Geol P-A* **224**, 197-221 (2002).
2. Holz M, Franca AB, Souza PA, Iannuzzi R, Rohn R. A stratigraphic chart of the Late Carboniferous/Permian succession of the eastern border of the Parana Basin, Brazil, South America. *J S Am Earth Sci* **29**, 381-399 (2010).

### B. Triassic marine reptiles before mid-Spathian.

There is no Triassic marine reptiles that is known to be definitively older than the mid-Spathian. Almost all Early Triassic marine reptile records are from the Subcolumbites Zone, which is the fourth from the bottom of the five ammonite zones of the Spathian<sup>1</sup>, when known. This is true for Anhui<sup>2</sup>, South Kitakami<sup>3</sup>, and Spitsbergen<sup>4</sup>. Specimens from British Columbia<sup>5, 6, 7, 8</sup> and Idaho<sup>9, 10</sup> are from screes, while *Thaisaurus* from Thailand has unknown age within the Triassic<sup>11</sup>. *Corosaurus* from Wyoming has a controversial stratigraphic position that could be anywhere in the Anisian (Middle Triassic) and Olenekian (Lower Triassic) because of disconformity and lack of index fossils.

Some of thalattosaurs<sup>6</sup> and ichthyosaurs<sup>8</sup> from British Columbia were once considered to be from the Smithian but this idea was later overturned by the original

authors<sup>7</sup>, who considered them to be younger. The only record definitively older than the Subcolumbites Zone is a *Chaohusaurus* from the Procolumbites Zone (mid-Spathian)<sup>2</sup>.

1. Gradstein FM, Ogg JG, Schmitz MD, Ogg GM. *The Geologic Time Scale 2012*. Elsevier (2012).
2. Motani R, Jiang D, Tintori A, Rieppel O, Chen GB. Terrestrial origin of viviparity indicated by the oldest embryonic fossil of Mesozoic marine reptiles. *PLoS One* **9**, e8B640 (2014).
3. Ehiro M. Spathian ammonoids *Metadagnoceras* and *Keyserlingites* from the Osawa Formation in the Southern Kitakami Massif, Northeast Japan. *Trans Proc Palaeontol Soc Japan New Ser* **171**, 229-236 (1993).
4. Harland WB. The geology of svalbard. *Memoir of the Geological Society of London* **17**, 1-521 (1997).
5. Brinkman DB, Zhao XJ, Nicholls EL. A Primitive Ichthyosaur from the Lower Triassic of British-Columbia, Canada. *Palaeontology* **35**, 465-474 (1992).
6. Nicholls EL, Brinkman D. New thalattosaurs (Reptilia: Diapsida) from the Triassic Sulphur Mountain Formation of Wapiti Lake, British Columbia. *Journal of Paleontology* **67**, 263-278 (1993).
7. Nicholls EL, Brinkman DB. A new ichthyosaur from the Triassic of Sulphur Mountain Formation of British Columbia. In: *Vertebrate Fossils and the Evolution of Scientific Concepts* (ed<sup>^</sup>(eds Sarjeant WAS). Gordon and Breach (1995).
8. Callaway JM, Brinkman DB. Ichthyosaurs (Reptilia, Ichthyosauria) from the Lower and Middle Triassic Sulfur Mountain Formation, Wapiti Lake Area, British-Columbia, Canada. *Can J Earth Sci* **26**, 1491-1500 (1989).
9. Massare JA, Callaway JM. Cymbospondylus (Ichthyosauria, Shastasauridae) from the Lower Triassic Thaynes Formation of Southeastern Idaho. *Journal of Vertebrate Paleontology* **14**, 139-141 (1994).
10. Scheyer TM, Romano C, Jenks J, Bucher H. Early Triassic marine biotic recovery: the predators' perspective. *PLoS One* **9**, e88987 (2014).
11. McGowan C, Motani R. *Ichthyopterygia*. Verlag Dr. Friedrich Pfeil (2003).

### **C. Effect of metabolic rate on the relative skull size of lunge feeders.**

The difference in metabolic rates between mammals and reptiles may lead to different size of lunge feeding apparatuses, especially the mandible. We accounted for this bias by using an approximate model below. The weak positive allometry observed in mandibular length is expected based on a simple dimensional argument. It is generally

known that the basal metabolic rates (Mb) are approximately proportional to the body mass (W) raised to 0.75, although controversies exist. Assuming that the body mass is roughly proportional to the cube of body length (Lb) in similarly shaped animals:

$$Mb = c_1 W^{0.75} = c_1 c_2 Lb^{2.25} \quad (1)$$

where  $c_1$  and  $c_2$  are constants. The amount of food that passes through the gape per time is proportional to the cross sectional area of the gape, which is roughly proportional to the square of mandibular length (Lm), assuming a limited variation in jaw design, including gape angle. Then, if food consumption rate is roughly proportional to the basal metabolic rate and foraging duration does not differ drastically among individuals:

$$Mb = c_3 Lm^2 \quad (2)$$

where  $c_3$  is a constant. Then, from (1) and (2):

$$Lm = (c_1 c_2)^{0.5} c_3^{-1} Lb^{1.125} \quad (3).$$

This model involves many approximations and therefore is admittedly simplistic. Yet, the expected slope of 1.125 is similar to 1.07 reported in this paper, and 1.11 previously<sup>1</sup>. In equation (3), the difference in metabolic rates is represented by a constant  $c_1$ . Then, the difference in mandibular length is expected to be roughly proportional to the square root of the difference in metabolic rates.

The model described above suggests that reptiles should have smaller mandibles for lunge feeding than mammals because of their lower metabolic rates that would mandate less food consumption, everything else being the same. At 37°C, average mammals would use about 7 times more oxygen than the average reptiles of the same size, based on the data compiled by<sup>2</sup> and the equations of<sup>3</sup>. Then, from equation (3) in Methods, average reptiles

would have about 38% the mandibular length of average mammals for lunge feeding, where mandibular size is expected to determine the amount of water captured per time for a given relative speed. If so, an average lunge-feeding reptile at the size of *Hupehsuchus* would have a mandibular length of about 6.19 cm. The observed length of 13.34 cm is much longer than this expected value. A combination of many factors can explain the difference between the two values, such as lower prey density, less foraging time, and higher-than-average metabolic rate for *Hupehsuchus*. None of these factors, however, can be estimated reasonably. In conclusion, the skull of *Hupehsuchus* is not smaller than what is expected for a lunge-feeding reptile of its size.

- 1 Pyenson, N. D., Goldbogen, J. A. & Shadwick, R. E. Mandible allometry in extant and fossil Balaenopteridae (Cetacea: Mammalia): the largest vertebrate skeletal element and its role in rorqual lunge feeding. *Biological Journal of the Linnean Society* **108**, 586-599, doi:DOI 10.1111/j.1095-8312.2012.02032.x (2013).
- 2 Makarieva, A. M. *et al.* Mean mass-specific metabolic rates are strikingly similar across life's major domains: Evidence for life's metabolic optimum. *Proceedings of the National Academy of Sciences of the United States of America* **105**, 16994-16999, doi:DOI 10.1073/pnas.0802148105 (2008).
- 3 Gillooly, J. F., Brown, J. H., West, G. B., Savage, V. M. & Charnov, E. L. Effects of size and temperature on metabolic rate. *Science* **293**, 2248-2251, doi:DOI 10.1126/science.1061967 (2001).

#### **D. R packages used.**

- 1 Garland, T., Harvey, P. H. & Ives, A. R. Procedures for the Analysis of Comparative Data Using Phylogenetically Independent Contrasts. *Systematic Biol* **41**, 18-32, doi:10.2307/2992503 (1992).
- 2 R+Core+Team. *R: A language and environment for statistical computing.* . (R Foundation for Statistical Computing, Vienna, Austria. URL <http://www.R-project.org/>, 2013).

- 3 Paradis, E., Claude, J. & Strimmer, K. APE: Analyses of Phylogenetics and Evolution in R language. *Bioinformatics* **20**, 289-290, doi:10.1093/bioinformatics/btg412 (2004).
- 4 Warton, D. I., Duursma, R. A., Falster, D. S. & Taskinen, S. smatr 3-an R package for estimation and inference about allometric lines. *Methods Ecol Evol* **3**, 257-259, doi:10.1111/j.2041-210X.2011.00153.x (2012).

#### E. References used for Figure 2.

- 1 McGowan, C. & Motani, R. *Ichthyopterygia*. Vol. 8 (Verlag Dr. Friedrich Pfeil, 2003).
- 2 Motani, R. *et al.* A basal ichthyosauriform with a short snout from the Lower Triassic of China. *Nature* (in press).
- 3 Nielsen, J. G., Bertelsen, E. & Jespersen, A. The Biology of *Eurypharynx pelecanoioides* (Pisces, Eurypharyngidae). *Acta Zool-Stockholm* **70**, 187-197 (1989).
- 4 Meyers, R. A. & Myers, R. P. Mandibular bowing and mineralization in Brown Pelicans. *Condor* **107**, 445-449, doi:10.1650/7743 (2005).
- 5 Ferry-Graham, L. A., Wainwright, P. C., Hulsey, C. D. & Bellwood, D. R. Evolution and mechanics of long jaws in butterflyfishes (family Chaetodontidae). *J Morphol* **248**, 120-143, doi:10.1002/Jmor.1024 (2001).
- 6 Kammerer, C. F., Grande, L. & Westneat, M. W. Comparative and developmental functional morphology of the jaws of living and fossil gars (Actinopterygii : Lepisosteidae). *J Morphol* **267**, 1017-1031, doi:10.1002/Jmor.10293 (2006).
- 7 Montgomery, J. C. & Saunders, A. J. Functional-Morphology of the Piper Hyporhamphus-Ihi with Reference to the Role of the Lateral Line in Feeding. *Proc R Soc Ser B-Bio* **224**, 197-208, doi:10.1098/rspb.1985.0029 (1985).
- 8 Zusi, R. L. Introduction to the skeleton of hummingbirds (Aves: Apodiformes, Trochilidae) in functional and phylogenetic contexts. *Ornithological Monographs* **77**, 1-94 (2013).
- 9 Shufeldt, R. W. Osteology of *Numenius longirostris*, with notes upon the skeletons of other American Limicolae. *J Anat Physiol* **19**, 1-93 (1884).
- 10 Ferreira, C. D. & Donatelli, R. J. Skull osteology of *Platalea ajaja* (Linnaeus) (Aves, Ciconiiformes), compared with others species of Threskiornithidae. *Rev Bras Zool* **22**, 529-551, doi:10.1590/S0101-81752005000300003 (2005).
- 11 Sereno, P. C. & Larsson, H. C. E. Cretaceous Crocodyliforms from the Sahara. *Zookeys*, 1-143, doi:10.3897/zookeys.28.325 (2009).
- 12 Wang, X., Rodrigues, T., Jiang, S., Cheng, X. & Kellner, A. W. A. An Early Cretaceous pterosaur with an unusual mandibular crest from China and a potential novel feeding strategy. *Scientific Reports* **4**, 6329, doi:10.1038/srep06329 (2014).

- 13 Motani, R., Jiang, D., Tintori, A., Rieppel, O. & Chen, G. B. Terrestrial origin of viviparity indicated by the oldest embryonic fossil of Mesozoic marine reptiles. *PLoS One* **9**, e8B640, doi:10.1371/journal.pone.0088640 (2014).
- 14 Shufeldt, R. W. Comparative osteology of certain rails and cranes, and the systematic positions of the supersuborders Gruiformes and Ralliformes. *Anatomical Record* **9**, 731-750, doi:10.1002/ar.1090091002 (1915).
- 15 Johnson, R. The Cranial and Cervical Osteology of the European Oystercatcher *Haematopus-Ostralegus* L. *J Morphol* **182**, 227-244, doi:DOI 10.1002/jmor.1051820209 (1984).
- 16 Raikow, R. J. Osteology and Taxonomic Position of White-Backed Duck, *Thalassornis-Leuconotus*. *Wilson Bull* **83**, 270-& (1971).
- 17 Shufeldt, R. W. *Osteology of Birds*. (University of the State of New York, 1909).

Supplementary Table S1. Feeding type diversity of marine reptiles in the Triassic. Brackets suggest that a feeding style was necessarily present because the following clades persisted through the interval despite the lack of direct record: Pelagic-ram-pointed, Ichthyoptrygia; Pelagic-ram-rounded, Omphalosauridae; Demersal-ram-pointed, Eosauroptrygia; and Demersal-ram-rounded, Placodontia.

| Habitat      | Pelagic         |     |   | Demersal |     |   |       |   |     | Total |
|--------------|-----------------|-----|---|----------|-----|---|-------|---|-----|-------|
|              | ram with biting |     |   | suction  |     |   | lunge |   |     |       |
| Capture      | p               | r   | n | p        | r   | n | f'    | n | n/f |       |
| Rhaetian     | X               |     |   |          | X   |   |       |   |     | 2     |
| Sevatian     | (X)             |     |   |          | (X) |   |       |   |     | 2     |
| Alaunian     | X               |     |   |          | X   | X |       |   |     | 3     |
| Lancian      | X               |     |   |          | (X) |   |       |   |     | 2     |
| Tuvalian     | X               |     |   |          | X   |   |       |   |     | 2     |
| Julian       | X               |     | X | X        | X   |   |       |   |     | 4     |
| Longobardian | X               |     |   | X        | X   |   |       |   |     | 3     |
| Fassanian    | X               | X   |   | X        | X   |   |       |   |     | 4     |
| Illyrian     | X               | X   |   | X        | X   |   |       |   |     | 4     |
| Pelsonian    | X               | X   |   | X        | X   |   | X     |   |     | 5     |
| Bithynian    | X               | (X) |   | (X)      | X   |   |       |   |     | 4     |
| Aegean       | (X)             | (X) |   | X        | X   |   |       |   |     | 4     |
| Spathian     | X               | X   |   | X        | X   |   |       | X | X   | 6     |



Supplementary Table S2. Data used to make Supplementary Table S1. Stratigraphic range was derived from a Kelley et al. (2014)<sup>1</sup> for most species; references are given for species that we added. In a trial to maximize the number of feeding types per substage, age assignments that were found to be questionable by Kelley et al. (2014) were all considered valid. For the same reason, taxa that span two substages were counted for both substages.

| Binomial                                       | CLADE               | Habitat  | Approach | Teeth | FirstSubstage   | LastSubstage     |
|------------------------------------------------|---------------------|----------|----------|-------|-----------------|------------------|
| <i>Ichthyosaurus communis</i>                  | Ichthyopterygia     | pelagic  | ram      | point | Rhaetian        | Early Sinemurian |
| <i>Macroplacus raeticus</i>                    | Sauropterygia       | demersal | ram      | round | Rhaetian        | Rhaetian         |
| <i>Psephoderma anglicum</i>                    | Sauropterygia       | demersal | ram      | round | Rhaetian        | Rhaetian         |
| <i>Callawayia neoscapularis</i>                | Ichthyopterygia     | pelagic  | ram      | point | Lacian          | Lacian           |
| <i>Hudsonelpidia brevirostris</i>              | Ichthyopterygia     | pelagic  | ram      | point | Lacian          | Lacian           |
| <i>Sikannisuchus huskyi</i>                    | Archosauria         | pelagic  | ram      | point | Lacian          | Lacian           |
| <i>Himalayasaurus tibetensis</i>               | Ichthyopterygia     | pelagic  | ram      | point | Lacian/Alaunian | Lacian/Alaunian  |
| <i>Endennasaurus acutirostris</i>              | Thalattosauriformes | demersal | ram      | none  | Alaunian        | Alaunian         |
| <i>Macgowania janiceps</i>                     | Ichthyopterygia     | pelagic  | ram      | point | Alaunian        | Alaunian         |
| <i>Psephoderma alpinum</i>                     | Sauropterygia       | demersal | ram      | round | Alaunian        | Rhaetian         |
| <i>Shonisaurus sikanniensis</i>                | Ichthyopterygia     | pelagic  | ram      | point | Alaunian        | Alaunian         |
| <i>Californosaurus perrini</i>                 | Ichthyopterygia     | pelagic  | ram      | —     | Tuvalian        | Tuvalian         |
| <i>Nectosaurus halinus</i>                     | Thalattosauriformes | demersal | ram      | round | Tuvalian        | Tuvalian         |
| <i>Shastasaurus pacificus</i>                  | Ichthyopterygia     | pelagic  | ram      | point | Tuvalian        | Tuvalian         |
| <i>Shonisaurus popularis</i>                   | Ichthyopterygia     | pelagic  | ram      | point | Tuvalian        | Tuvalian         |
| <i>Thalattosaurus alexandrae</i>               | Thalattosauriformes | demersal | ram      | round | Tuvalian        | Tuvalian         |
| <i>Toretocnemus californicus</i>               | Ichthyopterygia     | pelagic  | ram      | point | Tuvalian        | Tuvalian         |
| <i>Toretocnemus zitteli</i>                    | Ichthyopterygia     | pelagic  | ram      | point | Tuvalian        | Tuvalian         |
| <i>Placochelys placodonta</i>                  | Sauropterygia       | demersal | ram      | round | Julian/Tuvalian | Julian/Tuvalian  |
| <i>Anshunsaurus</i><br><i>huangguoshuensis</i> | Thalattosauriformes | pelagic  | ram      | point | Julian          | Julian           |
| <i>Bobosaurus forojuliensis</i>                | Sauropterygia       | pelagic  | ram      | —     | Julian          | Julian           |
| <i>Concavispina biseridens</i> <sup>2</sup>    | Thalattosauriformes | demersal | ram      | round | Julian          | Julian           |

|                                                |                     |          |     |       |                     |                     |
|------------------------------------------------|---------------------|----------|-----|-------|---------------------|---------------------|
| <i>Guanlingsaurus liangae</i>                  | Ichthyopterygia     | pelagic  | ram | none  | Julian              | Julian              |
| <i>Guizhouichthyosaurus tangae</i>             | Ichthyopterygia     | pelagic  | ram | point | Julian              | Julian              |
| <i>Henodus chelyops</i>                        | Sauropterygia       | demersal | ram | round | Julian              | Julian              |
| <i>Miodentosaurus brevis</i>                   | Thalattosauriformes | pelagic  | ram | point | Julian              | Julian              |
| <i>Protenodontosaurus italicus</i>             | Sauropterygia       | demersal | ram | round | Julian              | Julian              |
| <i>Psephochelys polyosteoderma</i>             | Sauropterygia       | demersal | ram | round | Julian              | Julian              |
| <i>Qianichthyosaurus zhoui</i>                 | Ichthyopterygia     | pelagic  | ram | point | Julian              | Julian              |
| <i>Sinocyamodus xinpuensis</i>                 | Sauropterygia       | demersal | ram | round | Julian              | Julian              |
| <i>Xinpusaurus bamaolinensis</i>               | Thalattosauriformes | demersal | ram | round | Julian              | Julian              |
| <i>Xinpusaurus suni</i>                        | Thalattosauriformes | demersal | ram | round | Julian              | Julian              |
| <i>Anshunsaurus huangnihensis</i> <sup>3</sup> | Thalattosauriformes | pelagic  | ram | point | Longobardian        | Longobardian        |
| <i>Anshunsaurus wushaensis</i>                 | Thalattosauriformes | pelagic  | ram | point | Longobardian        | Longobardian        |
| <i>Fuyuansaurus acutirostris</i> <sup>4</sup>  | Protosauria         | pelagic  | ram | point | Longobardian        | Longobardian        |
| <i>Glyphoderma kangi</i>                       | Sauropterygia       | demersal | ram | round | Longobardian        | Longobardian        |
| <i>Keichousaurus hui</i>                       | Sauropterygia       | demersal | ram | point | Longobardian        | Longobardian        |
| <i>Lariosaurus balsami</i>                     | Sauropterygia       | demersal | ram | point | Longobardian        | Longobardian        |
| <i>Lariosaurus valceresii</i>                  | Sauropterygia       | demersal | ram | point | Longobardian        | Longobardian        |
| <i>Lariosaurus xingyiensis</i>                 | Sauropterygia       | demersal | ram | point | Longobardian        | Longobardian        |
| <i>Macrocnemus fuyuanensis</i>                 | Protosauria         | pelagic  | ram | point | Longobardian        | Longobardian        |
| <i>Neusticosaurus staubi</i>                   | Sauropterygia       | demersal | ram | point | Longobardian        | Longobardian        |
| <i>Neusticosaurus toepflichi</i>               | Sauropterygia       | demersal | ram | point | Longobardian        | Longobardian        |
| <i>Nothosaurus cymatosauroides</i>             | Sauropterygia       | demersal | ram | point | Longobardian        | Longobardian        |
| <i>Nothosaurus edingerae</i>                   | Sauropterygia       | demersal | ram | point | Longobardian/Julian | Longobardian/Julian |
| <i>Nothosaurus youngi</i>                      | Sauropterygia       | demersal | ram | point | Longobardian        | Longobardian        |
| <i>Psephosaurus suevicus</i>                   | Sauropterygia       | demersal | ram | round | Longobardian        | Longobardian        |

|                                                  |                     |          |     |       |                        |                        |
|--------------------------------------------------|---------------------|----------|-----|-------|------------------------|------------------------|
| <i>Qianichthysaurus xingyiensis</i> <sup>5</sup> | Ichthyopterygia     | pelagic  | ram | point | Longobardian           | Longobardian           |
| <i>Qianxisaurus chajiangensis</i> <sup>6</sup>   | Sauropterygia       | demersal | ram | point | Longobardian           | Longobardian           |
| <i>Yunguisaurus liae</i>                         | Sauropterygia       | pelagic  | ram | point | Longobardian           | Longobardian           |
| <i>Lariosaurus curionii</i>                      | Sauropterygia       | demersal | ram | point | Fassanian/Longobardian | Fassanian/Longobardian |
| <i>Askeptosaurus italicus</i>                    | Thalattosauriformes | pelagic  | ram | point | Fassanian              | Fassanian              |
| <i>Blezingeria ichthyospondylus</i>              | Thalattosauriformes |          | ram | —     | Fassanian              | Fassanian              |
| <i>Ceresiosaurus calcagnii</i>                   | Sauropterygia       | demersal | ram | point | Longobardian           | Fassanian              |
| <i>Ceresiosaurus lanzii</i>                      | Sauropterygia       | demersal | ram | point | Longobardian           | Fassanian              |
| <i>Cyamodus hildegardensis</i>                   | Sauropterygia       | demersal | ram | round | Fassanian              | Fassanian              |
| <i>Cymbospondylus piscosus</i>                   | Ichthyopterygia     | pelagic  | ram | point | Fassanian              | Fassanian              |
| <i>Lariosaurus buzzii</i>                        | Sauropterygia       | demersal | ram | point | Fassanian              | Fassanian              |
| <i>Neusticosaurus edwardsi</i>                   | Sauropterygia       | demersal | ram | point | Fassanian              | Fassanian              |
| <i>Neusticosaurus peyeri</i>                     | Sauropterygia       | demersal | ram | point | Fassanian              | Fassanian              |
| <i>Neusticosaurus pusillus</i>                   | Sauropterygia       | demersal | ram | point | Fassanian              | Fassanian              |
| <i>Nothosaurus jagisteus</i>                     | Sauropterygia       | demersal | ram | point | Fassanian              | Fassanian              |
| <i>Omphalosaurus wolfi</i>                       | Omphalosauria       | pelagic  | ram | round | Fassanian              | Fassanian              |
| <i>Paraplocodus broilii</i>                      | Sauropterygia       | demersal | ram | round | Fassanian              | Fassanian              |
| <i>Serpianosaurus mirigiolensis</i>              | Sauropterygia       | demersal | ram | point | Fassanian              | Fassanian              |
| <i>Simosaurus gaillardoti</i>                    | Sauropterygia       | demersal | ram | point | Fassanian              | Julian                 |
| <i>"Psephosaurus" sinaiticus</i>                 | Sauropterygia       | demersal | ram | round | Illyrian/Fassanian     | Illyrian/Fassanian     |
| <i>Clarazia schinzi</i>                          | Thalattosauriformes | demersal | ram | round | Illyrian/Fassanian     | Illyrian/Fassanian     |
| <i>Eusaurosphargis dalsassoi</i>                 | Helveticosauridae   | demersal | ram | point | Illyrian/Fassanian     | Illyrian/Fassanian     |
| <i>Helveticosaurus zollingeri</i>                | Helveticosauridae   | demersal | ram | point | Illyrian/Fassanian     | Illyrian/Fassanian     |
| <i>Hescheleria ruebeli</i>                       | Thalattosauriformes | demersal | ram | round | Illyrian/Fassanian     | Illyrian/Fassanian     |
| <i>Lariosaurus stensioei</i>                     | Sauropterygia       | demersal | ram | point | Illyrian/Fassanian     | Illyrian/Fassanian     |
| <i>Macrocnemus bassanii</i>                      | Protosauria         | pelagic  | ram | point | Illyrian/Fassanian     | Illyrian/Fassanian     |

|                                                   |                 |          |     |        |                    |                    |
|---------------------------------------------------|-----------------|----------|-----|--------|--------------------|--------------------|
| <i>Nothosaurus haasi</i>                          | Sauropterygia   | demersal | ram | point  | Illyrian/Fassanian | Illyrian/Fassanian |
| <i>Nothosaurus tchernovi</i>                      | Sauropterygia   | demersal | ram | point  | Illyrian/Fassanian | Illyrian/Fassanian |
| <i>Tanystropheus langobardicus</i>                | Protorosauria   | pelagic  | ram | point  | Illyrian/Fassanian | Illyrian/Fassanian |
| <i>Anarosaurus heterodontus</i>                   | Sauropterygia   | demersal | ram | point  | Illyrian           | Illyrian           |
| <i>Anarosaurus pumilio</i>                        | Sauropterygia   | demersal | ram | point  | Illyrian           | Illyrian           |
| <i>Augustasaurus hagdorni</i>                     | Sauropterygia   | pelagic  | ram | point  | Illyrian           | Illyrian           |
| <i>Besanosaurus leptorhynchus</i>                 | Ichthyopterygia | pelagic  | ram | point  | Illyrian           | Illyrian           |
| <i>Cyamodus kuhnschnyderi</i>                     | Sauropterygia   | demersal | ram | round  | Illyrian           | Fassanian          |
| <i>Cyamodus muensteri</i>                         | Sauropterygia   | demersal | ram | round  | Illyrian           | Illyrian           |
| <i>Cyamodus rostratus</i>                         | Sauropterygia   | demersal | ram | round  | Illyrian           | Illyrian           |
| <i>Cymbospondylus buchseri</i>                    | Ichthyopterygia | pelagic  | ram | point  | Illyrian           | Illyrian           |
| <i>Cymbospondylus nichollsi</i>                   | Ichthyopterygia | pelagic  | ram | point  | Illyrian           | Illyrian           |
| <i>Dactylosaurus gracilis</i>                     | Sauropterygia   | demersal | ram | point  | Illyrian           | Illyrian           |
| <i>Mixosaurus cornalianus</i>                     | Ichthyopterygia | pelagic  | ram | round  | Illyrian           | Illyrian           |
| <i>Mixosaurus kuhnschnyderi</i>                   | Ichthyopterygia | pelagic  | ram | round  | Illyrian           | Illyrian           |
| <i>Nothosaurus giganteus</i>                      | Sauropterygia   | demersal | ram | point  | Illyrian           | Julian             |
| <i>Nothosaurus juvenilis</i>                      | Sauropterygia   | demersal | ram | point  | Illyrian           | Illyrian           |
| <i>Nothosaurus marchicus</i>                      | Sauropterygia   | demersal | ram | point  | Illyrian           | Illyrian           |
| <i>Nothosaurus mirabilis</i>                      | Sauropterygia   | demersal | ram | point  | Illyrian           | Fassanian          |
| <i>Omphalosaurus nevadanus</i>                    | Omphalosauria   | pelagic  | ram | round  | Illyrian           | Illyrian           |
| <i>Phalarodon callawayi</i>                       | Ichthyopterygia | pelagic  | ram | round  | Illyrian           | Illyrian           |
| <i>Phantomasaurus neubigi</i>                     | Ichthyopterygia | pelagic  | ram | point  | Illyrian           | Illyrian           |
| <i>Pistosaurus longaevus</i>                      | Sauropterygia   | pelagic  | ram | —      | Illyrian           | Illyrian           |
| <i>Atopodentatus unicus</i>                       | Sauropterygia   | demersal | ram | filter | Pelsonian          | Pelsonian          |
| <i>Diandongosaurus acutidentatus</i> <sup>7</sup> | Sauropterygia   | demersal | ram | point  | Pelsonian          | Pelsonian          |
| <i>Dianopachysaurus dingi</i> <sup>8</sup>        | Sauropterygia   | demersal | ram | point  | Pelsonian          | Pelsonian          |

|                                                    |                 |          |     |       |                 |                 |
|----------------------------------------------------|-----------------|----------|-----|-------|-----------------|-----------------|
| <i>Dinocephalosaurus orientalis</i>                | Protorosauria   | demersal | ram | point | Pelsonian       | Pelsonian       |
| <i>Largocephalosaurus plicarpon</i> <sup>9</sup>   | Saurosphargidae | demersal | ram | point | Pelsonian       | Pelsonian       |
| <i>Largocephalosaurus qianensis</i> <sup>10</sup>  | Saurosphargidae | demersal | ram | point | Pelsonian       | Pelsonian       |
| <i>Lariosaurus hongguoensis</i>                    | Sauropterygia   | demersal | ram | point | Pelsonian       | Pelsonian       |
| <i>Mixosaurus panxianensis</i>                     | Ichthyopterygia | pelagic  | ram | round | Pelsonian       | Pelsonian       |
| <i>Mixosaurus xindianensis</i> <sup>11</sup>       | Ichthyopterygia | pelagic  | ram | round | Pelsonian       | Pelsonian       |
| <i>Nothosaurus rostellatus</i> <sup>12</sup>       | Sauropterygia   | demersal | ram | point | Pelsonian       | Pelsonian       |
| <i>Nothosaurus yangjuanensis</i>                   | Sauropterygia   | demersal | ram | point | Pelsonian       | Pelsonian       |
| <i>Phalarodon fraasi</i>                           | Ichthyopterygia | pelagic  | ram | round | Pelsonian       | Longobardian    |
| <i>Placodus inexpectatus</i>                       | Sauropterygia   | demersal | ram | round | Pelsonian       | Pelsonian       |
| <i>Qianosuchus mixtus</i>                          | Archosauria     | pelagic  | ram | point | Pelsonian       | Pelsonian       |
| <i>Sinosaurosphargis yunguiensis</i> <sup>13</sup> | Saurosphargidae | demersal | ram | point | Pelsonian       | Pelsonian       |
| <i>Tanystropheus haasi</i>                         | Protorosauria   | pelagic  | ram | point | Pelsonian       | Pelsonian       |
| <i>Tholodus schmidi</i>                            | Ichthyopterygia | demersal | ram | round | Pelsonian       | Pelsonian       |
| <i>Wumengosaurus delicatmandibularis</i>           | Sauropterygia   | pelagic  | ram | point | Pelsonian       | Pelsonian       |
| <i>Xinminosaurus catactes</i>                      | Ichthyopterygia | pelagic  | ram | round | Pelsonian       | Pelsonian       |
| <i>"Psephosaurus" mosis</i>                        | Sauropterygia   | demersal | ram | round | Bithynian       | Bithynian       |
| <i>Phalarodon atavus</i>                           | Ichthyopterygia | pelagic  | ram | point | Bithynian       | Illyrian        |
| <i>Placodus gigas</i>                              | Sauropterygia   | demersal | ram | round | Bithynian       | Fassanian       |
| <i>Chinchenia sungi</i>                            | Sauropterygia   | demersal | ram | point | Aegean_question | Aegean_question |
| <i>Cymatosaurus fridericianus</i>                  | Sauropterygia   | demersal | ram | point | Aegean          | Aegean          |
| <i>Cymatosaurus latifrons</i>                      | Sauropterygia   | demersal | ram | point | Aegean          | Aegean          |
| <i>Cymatosaurus minor</i>                          | Sauropterygia   | demersal | ram | point | Aegean          | Aegean          |
| <i>Cymatosaurus multidentatus</i>                  | Sauropterygia   | demersal | ram | point | Aegean          | Aegean          |

|                                                     |                     |          |         |         |                   |                   |
|-----------------------------------------------------|---------------------|----------|---------|---------|-------------------|-------------------|
| <i>Germanosaurus latissimus</i>                     | Sauropterygia       | demersal | ram     | point   | Aegean            | Aegean            |
| <i>Germanosaurus schafferi</i>                      | Sauropterygia       | demersal | ram     | point   | Aegean            | Aegean            |
| <i>Nothosaurus winkelhorsti</i>                     | Sauropterygia       | demersal | ram     | point   | Aegean            | Aegean            |
| <i>Nothosaurus winterswijkensis</i>                 | Sauropterygia       | demersal | ram     | point   | Aegean            | Aegean            |
| <i>Sanchiaosaurus dengi</i>                         | Sauropterygia       | demersal | ram     | point   | Aegean_question   | Aegean_question   |
| <i>Thalattosaurus borealis</i>                      | Thalattosauriformes | demersal | ram     | round   | Aegean_question   | Aegean_question   |
| <i>Agkistrognathus campbelli</i>                    | Thalattosauriformes | demersal | ram     | round   | Spathian_question | Spathian_question |
| <i>Cartorhynchus lenticarpus</i> <sup>14</sup>      | Ichthyosauriformes  | demersal | suction | none    | Spathian          | Spathian          |
| <i>Chaohusaurus chaoxianensis</i>                   | Ichthyopterygia     | pelagic  | ram     | round   | Spathian          | Spathian          |
| <i>Chaohusaurus geishanensis</i>                    | Ichthyopterygia     | pelagic  | ram     | round   | Spathian          | Spathian          |
| <i>Chaohusaurus zhangjiawanensis</i> <sup>15</sup>  | Ichthyopterygia     | pelagic  | ram     | round   | Spathian          | Spathian          |
| <i>Corosaurus alcovensis</i>                        | Sauropterygia       | demersal | ram     | point   | Spathian          | Spathian          |
| <i>Eohupehsuchus brevicollis</i> <sup>16</sup>      | Hupehsuchia         | demersal | lunge   | none    | Spathian          | Spathian          |
| <i>Grippia longirostris</i>                         | Ichthyopterygia     | pelagic  | ram     | round   | Spathian          | Spathian          |
| <i>Gulosaurus helmi</i> <sup>17</sup>               | Ichthyopterygia     | pelagic  | ram     | round   | Spathian_question | Spathian_question |
| <i>Hanosaurus hupehensis</i>                        | Sauropterygia       | demersal | ram     | point   | Spathian          | Spathian          |
| <i>Hupehsuchus nanchangensis</i>                    | Hupehsuchia         | demersal | lunge   | none    | Spathian          | Spathian          |
| <i>Isfjordosaurus minor</i>                         | Ichthyopterygia     | pelagic  | ram     | point   | Spathian          | Spathian          |
| <i>Keichousaurus yuananensis</i>                    | Sauropterygia       | demersal | ram     | point   | Spathian          | Spathian          |
| <i>Kwangsisaurus orientalis</i>                     | Sauropterygia       | demersal | ram     | point   | Spathian          | Spathian          |
| <i>Majiashanosaurus discoracoidis</i> <sup>18</sup> | Sauropterygia       | demersal | ram     | unknown | Spathian          | Spathian          |
| <i>Nanchangosaurus suni</i>                         | Hupehsuchia         | demersal | lunge   | none    | Spathian          | Spathian          |

|                                             |                     |          |       |       |                   |                   |
|---------------------------------------------|---------------------|----------|-------|-------|-------------------|-------------------|
| <i>Omphalosaurus nettarhynchus</i>          | Omphalosauria       | pelagic  | ram   | round | Spathian          | Spathian          |
| <i>Omphalosaurus nisseri</i>                | Omphalosauria       | pelagic  | ram   | round | Spathian          | Spathian          |
| <i>Parahupehsuchus longus</i> <sup>19</sup> | Hupehsuchia         | demersal | lunge | none  | Spathian          | Spathian          |
| <i>Paralonectes merriami</i>                | Thalattosauriformes | demersal | ram   | round | Spathian_question | Spathian_question |
| <i>Parvinatator wapitiensis</i>             | Ichthyopterygia     | pelagic  | ram   | point | Spathian_question | Spathian_question |
| <i>Thaisaurus chonglakmanii</i>             | Ichthyopterygia     | pelagic  | ram   | point | Spathian          | Spathian          |
| <i>Utatusaurus hataii</i>                   | Ichthyopterygia     | pelagic  | ram   | point | Spathian          | Spathian          |

1. Kelley NP, Motani R, Jiang DY, Rieppel O, Schmitz L. Selective extinction of Triassic marine reptiles during long-term sea-level changes illuminated by seawater strontium isotopes. *Palaeogeogr Palaeocl* **400**, 9-16 (2014).
2. Zhao L-J, Liu J, Li C, He T. A new thalattosaur, *Concavispina iseridens* gen. et sp. nov. from Guanling, Guizhou, China. *Vertebrata Palasiatica* **51**, 24-48 (2013).
3. Cheng L, Chen X, Wang C. A new species of Late Triassic *Anshunsaurus* (Reptilia : Thalattosauria) from Guizhou Province. *Acta Geol Sin* **81**, 1345-1351 (2007).
4. Fraser NC, Rieppel O, Chun L. A long-snouted protorosaur from the Middle Triassic of southern China. *Journal of Vertebrate Paleontology* **33**, 1120-1126 (2013).
5. Yang PF, Ji C, Jiang DY, Motani R, Sun ZY. A New Species of Qianichthyosaurus (Reptilia: Ichthyosauria) from Xingyi Fauna (Ladinian, Middle Trassic) of Guizhou, Southwestern China. *Journal of Vertebrate Paleontology* **32**, 197-198 (2012).
6. Cheng YN, Wu XC, Sato T, Shan HY. A new eosauroptrygian (Diapsida, Sauroptrygia) from the Triassic of China. *Journal of Vertebrate Paleontology* **32**, 1335-1349 (2012).

7. Shang Q-h, Wu X-c, Li C. A new eosauropterygian from Middle Triassic of eastern Yunnan Province, southwestern China. *Vertebrata Palasiatica*, (2011).
8. Liu J, *et al.* A new pachypleurosaur (Reptilia: Sauropterygia) from the lower Middle Triassic of southwestern China and the phylogenetic relationships of Chinese pachypleurosaurs. *Journal of Vertebrate Paleontology* **31**, 292-302 (2011).
9. Cheng L, Chen XH, Zeng XW, Cai YJ. A new eosauropterygian (Diapsida: Sauropterygia) from the Middle Triassic of Luoping, Yunnan Province. *J Earth Sci-China* **23**, 33-40 (2012).
10. Li C, Jiang D, Cheng L, Wu X, Rieppel O. A new species of *Largocephalosaurus* (Diapsida: Saurosphargidae), with implications for the morphological diversity and phylogeny of the group. *Geol Mag* **151**, 100-120 (2014).
11. Chen X-h, Cheng L. A new species of *Mixosaurus* (Reptilia: Ichthyosauria) from the Middle Triassic of Pu'an, Guizhou, China. *Acta Palaeontologica Sinica* **49**, 251-260 (2010).
12. Shang Q-h. A new species of *Nothosaurus* from the early Middle Triassic of Guizhou, China. *Vertebrata Palasiatica* **44**, 237-249 (2006).
13. Li C, Rieppel O, Wu X, Zhao L, Wang L. A new Triassic marine reptile from southwestern China. *Journal of Vertebrate Paleontology* **31**, 303-312 (2011).
14. Motani R, *et al.* A basal ichthyosauriform with a short snout from the Lower Triassic of China. *Nature* **05 November 2014**, (2014).
15. Chen XH, Sander PM, Cheng L, Wang XF. A New Triassic Primitive Ichthyosaur from Yuanan, South China. *Acta Geol Sin-Engl* **87**, 672-677 (2013).
16. Chen X-h, Motani R, Cheng L, Jiang D-y, Rieppel O. A small short-necked hupehsuchian providing additional evidence of predation on Hupehsuchia. *PLoS One* **9**, e115244 (2014).



17. Cuthbertson RS, Russell AP, Anderson JS. Cranial Morphology and Relationships of a New Grippidian (Ichthyopterygia) from the Vega-Phroso Siltstone Member (Lower Triassic) of British Columbia, Canada. *Journal of Vertebrate Paleontology* **33**, 831-847 (2013).
18. Jiang D, *et al.* Early Triassic eosauroptrygian *Majiashanosaurus discocoracoidis*, gen. et sp. nov. (Reptilia, Sauropterygia) from Chaohu, Anhui Province, China. *Journal of Vertebrate Paleontology*, (in press).
19. Chen X, Motani R, Cheng L, Jiang D, Rieppel O. A carapace-like bony 'body tube' in an Early Triassic marine reptile and early onset of marine tetrapod predation. *PLoS One* **9**, e94396 (2014).
